# Supplementary material for: Fatigue in Type 2 Diabetes: Impact on Quality of Life and Predictors
Source: PubMed Central journal article supplement (PMC5100935; doi:10.1371/journal.pone.0165652), 2016-11-08
Supplement: pone.0165652.s001.pdf [file pone.0165652.s001.pdf]

| Age | Gender | Weight (Kg) | Height (mtrs) | mtr <sup>2</sup> | BMI      | Years since | Hba1c | Gen Fat |
|-----|--------|-------------|---------------|------------------|----------|-------------|-------|---------|
| 65  | F      | 87.08       | 1.52          | 2.3104           | 37.69044 | 5           | 6.6   | 13      |
| 61  | F      | 62.1        | 1.64          | 2.6896           | 23.08894 | 25          | 5.1   | 5       |
| 70  | M      | 100.7       | 1.72          | 2.9584           | 34.03867 | 10          | 7.1   | 12      |
| 67  | M      | 105.4       | 1.69          | 2.8561           | 36.90347 | 6           | 6.1   | 9       |
| 52  | F      | 139.1       | 1.74          | 3.0276           | 45.94398 | 15          | 7.8   | 18      |
| 63  | M      | 121.8       | 1.86          | 3.4596           | 35.20638 | 8           | 6.6   | 13      |
| 51  | M      | 88.7        | 1.74          | 3.0276           | 29.29713 | 1           | 6.1   | 14      |
| 67  | M      | 101.4       | 1.78          | 3.1684           | 32.00353 | 15          | 7.1   | 10      |
| 65  | F      | 96.3        | 1.63          | 2.6569           | 36.24525 | 3           | 6     | 13      |
| 51  | F      | 85.27       | 1.67          | 2.7889           | 30.57478 | 3           | 8.4   | 11      |
| 54  | F      | 110         | 1.56          | 2.4336           | 45.20053 | 3           | 6     | 16      |
| 60  | F      | 132         | 1.66          | 2.7556           | 47.90245 | 3           | 5.8   | 19      |
| 70  | F      | 76.2        | 1.59          | 2.5281           | 30.14121 | 10          | 6.4   | 11      |
| 47  | F      | 64.3        | 1.64          | 2.6896           | 23.9069  | 7           | 7.4   | 16      |
| 59  | F      | 92.1        | 1.62          | 2.6244           | 35.09374 | 5           | 5.9   | 12      |
| 64  | M      | 127.1       | 1.86          | 3.4596           | 36.73835 | 17          | 9.5   | 11      |
| 54  | M      | 90.4        | 1.7           | 2.89             | 31.28028 | 12          | 5.6   | 14      |
| 65  | F      | 114.4       | 1.6           | 2.56             | 44.6875  | 7           | 6.2   | 20      |
| 58  | M      | 106.7       | 1.9           | 3.61             | 29.55679 | 10          | 9.4   | 7       |
| 60  | M      | 100.3       | 1.75          | 3.0625           | 32.75102 | 4           | 7     | 6       |
| 66  | M      | 147.4       | 1.76          | 3.0976           | 47.58523 | 12          | 6.2   | 15      |
| 64  | M      | 165.2       | 1.89          | 3.5721           | 46.24731 | 11          | 9.2   | 16      |
| 59  | M      | 103.9       | 1.75          | 3.0625           | 33.92653 | 10          | 7.6   | 13      |
| 69  | F      | 66.2        | 1.68          | 2.8224           | 23.45522 | 20          | 8.5   | 10      |
| 57  | M      | 154         | 1.83          | 3.3489           | 45.98525 | 6           | 9.8   | 13      |
| 65  | M      | 98.5        | 1.75          | 3.0625           | 32.16327 | 6           | 6.2   | 14      |
| 61  | F      | 63.4        | 1.65          | 2.7225           | 23.28742 | 1           | 6.3   | 11      |
| 60  | F      | 98.4        | 1.62          | 2.6244           | 37.49428 | 26          | 6.1   | 15      |
| 49  | F      | 105.4       | 1.69          | 2.8561           | 36.90347 | 7           | 10    | 13      |
| 66  | M      | 98.8        | 1.87          | 3.4969           | 28.2536  | 16          | 7.6   | 16      |
| 61  | M      | 92.1        | 1.69          | 2.8561           | 32.24677 | 25          | 8.7   | 12      |
| 47  | M      | 75.8        | 1.79          | 3.2041           | 23.65719 | 17          | 5.8   | 10      |
| 48  | F      | 90.9        | 1.56          | 2.4336           | 37.35207 | 2           | 7     | 18      |
| 48  | F      | 124.7       | 1.66          | 2.7556           | 45.2533  | 17          | 12.6  | 11      |
| 64  | M      | 94          | 1.83          | 3.3489           | 28.06892 | 6           | 5.5   | 13      |
| 69  | M      | 130         | 1.82          | 3.3124           | 39.24647 | 27          |       | 14      |
| 62  | M      | 80.5        | 1.64          | 2.6896           | 29.9301  | 12          | 10.8  | 19      |
| 51  | F      | 137.8       | 1.63          | 2.6569           | 51.86496 | 4           | 10.8  | 10      |
| 65  | M      | 107.2       | 1.81          | 3.2761           | 32.72183 | 8           | 6.2   | 10      |
| 65  | M      | 160.5       | 1.9           | 3.61             | 44.45983 | 1           | 6.2   | 17      |
| 65  | M      | 105.9       | 1.76          | 3.0976           | 34.18776 | 20          | 9.1   | 13      |
| 60  | F      | 81.8        | 1.61          | 2.5921           | 31.55742 | 11          | 11.6  | 6       |
| 65  | F      | 99.8        | 1.71          | 2.9241           | 34.13016 | 5           | 4.8   | 19      |
| 67  | M      | 122         | 1.73          | 2.9929           | 40.76314 | 4           | 5.6   | 19      |
| 58  | F      | 91.8        | 1.67          | 2.7889           | 32.9162  | 19          | 8.3   | 19      |
| 45  | M      | 102         | 1.87          | 3.4969           | 29.16869 | 1           | 9.1   | 12      |

|    |   |       |      |        |          |    |     |    |
|----|---|-------|------|--------|----------|----|-----|----|
| 44 | M | 95    | 1.8  | 3.24   | 29.32099 | 19 | 5.8 | 18 |
| 61 | F | 100.3 | 1.52 | 2.3104 | 43.4124  | 20 | 5.7 | 12 |

| Phy Fat | Red Act | Red Mot | Men Fat | Tot MFI | VAS  | PSQI | ADDQoL | BDI-2 |
|---------|---------|---------|---------|---------|------|------|--------|-------|
| 16      | 6       | 10      | 14      | 59      | 1.5  | 10   | -3.47  | 9     |
| 10      | 7       | 6       | 10      | 38      | 0    | 6    | -1.117 | 23    |
| 13      | 12      | 10      | 12      | 59      | 2    | 10   | -2     | 12    |
| 9       | 11      | 9       | 13      | 51      | 2    | 1    | -2.578 | 8     |
| 15      | 11      | 16      | 11      | 71      | 4.5  | 8    | -2.764 | 26    |
| 10      | 8       | 8       | 9       | 48      | 2.7  | 8    | -1.5   | 6     |
| 12      | 11      | 12      | 7       | 56      | 5    | 7    | -3.05  | 14    |
| 11      | 11      | 8       | 7       | 47      | 3    | 5    | -1.833 | 3     |
| 11      | 12      | 13      | 12      | 61      | 4.5  | 14   | -1.63  | 29    |
| 12      | 14      | 13      | 5       | 55      | 0    | 10   | -1.33  | 2     |
| 15      | 20      | 15      | 14      | 80      | 3.5  | 9    | -1.63  | 35    |
| 14      | 8       | 12      | 4       | 57      | 5    | 9    | -3.444 | 21    |
| 8       | 9       | 6       | 6       | 40      | 7    | 8    | -0.833 | 7     |
| 5       | 5       | 14      | 6       | 46      | 0    | 11   | -0.42  | 5     |
| 11      | 9       | 8       | 5       | 45      | 2    | 5    | -1.16  | 5     |
| 10      | 7       | 9       | 5       | 42      | 0    | 6    | -1.16  | 6     |
| 14      | 13      | 10      | 9       | 60      | 7    | 13   | -3.84  | 18    |
| 19      | 7       | 8       | 4       | 58      | 7.5  | 6    | -3.68  | 15    |
| 8       | 12      | 10      | 5       | 42      | 1    | 2    | -3.44  | 2     |
| 5       | 4       | 5       | 6       | 26      | 1.5  | 2    | -0.5   | 2     |
| 14      | 16      | 16      | 12      | 73      | 1    | 7    | -5.1   | 9     |
| 13      | 14      | 11      | 4       | 58      | 2.7  | 10   | -3     | 7     |
| 12      | 12      | 9       | 6       | 52      | 0    | 12   | -0.79  | 7     |
| 13      | 13      | 8       | 6       | 50      | 4    | 6    | -0.947 | 2     |
| 15      | 10      | 12      | 6       | 56      | 6.2  | 5    | -2.84  | 7     |
| 10      | 16      | 16      | 15      | 71      | 3.3  | 5    | -0.67  | 16    |
| 11      | 11      | 12      | 13      | 58      | 6.5  | 8    | -3.83  | 7     |
| 14      | 15      | 10      | 9       | 63      | 1.2  | 8    | -2.28  | 11    |
| 13      | 17      | 16      | 8       | 67      | 0    | 13   | -2.32  | 20    |
| 14      | 15      | 15      | 10      | 70      | 1    | 16   | -4.833 | 7     |
| 10      | 5       | 4       | 5       | 36      | 1.4  | 5    | -5.28  | 7     |
| 6       | 8       | 8       | 8       | 40      | 1.3  | 5    | -1.26  | 4     |
| 19      | 14      | 9       | 18      | 78      | 8    | 17   | -8.06  | 39    |
| 9       | 6       | 7       | 4       | 37      | 1.3  | 5    | -0.84  | 1     |
| 13      | 9       | 10      | 9       | 54      | 1.4  | 7    | -0.94  | 15    |
| 17      | 15      | 12      | 8       | 66      | 3.4  | 7    | -1.5   | 17    |
| 18      | 18      | 12      | 15      | 82      | 0.8  | 12   | -2.22  | 10    |
| 9       | 11      | 5       | 5       | 40      | 0    | 7    | -0.21  | 6     |
| 9       | 16      | 15      | 10      | 60      | 0    | 7    | -0.63  | 21    |
| 16      | 15      | 10      | 11      | 69      | 3    | 12   | -2.33  | 14    |
| 13      | 13      | 11      | 11      | 61      | 3.5  | 5    | -0.84  | 5     |
| 9       | 7       | 4       | 7       | 33      | 0.3  | 5    | -0.58  | 7     |
| 16      | 14      | 15      | 19      | 83      | 2.8  | 12   | -3.56  | 12    |
| 16      | 15      | 11      | 10      | 71      | 2.5  | 9    | -1.39  | 15    |
| 18      | 19      | 13      | 15      | 84      | 7.36 | 12   | -2.33  | 22    |
| 15      | 10      | 4       | 6       | 47      | 0    | 5    | 0      | 7     |

|    |    |   |   |    |     |    |        |    |
|----|----|---|---|----|-----|----|--------|----|
| 17 | 12 | 5 | 4 | 56 | 4.5 | 14 | -5.17  | 10 |
| 12 | 9  | 8 | 9 | 50 | 0   | 4  | -0.105 | 1  |

| <b>NOC</b> | <b>6 Min</b> |
|------------|--------------|
| 5          | 259.2        |
| 5          | 495.6        |
| 4          | 319          |
| 7          | 365          |
| 4          | 276          |
| 2          | 442          |
| 6          | 498.2        |
| 6          | 405          |
| 3          | 304.1        |
| 7          | 435.5        |
| 3          | 422          |
| 4          | 394.8        |
| 2          | 308          |
| 5          | 400.1        |
| 1          | 413.1        |
| 4          | 464.5        |
| 5          | 302.9        |
| 3          | 262.3        |
| 1          | 428.5        |
| 1          | 469.8        |
| 6          | 345.4        |
| 4          | 376.8        |
| 2          | 418.2        |
| 5          | 193.1        |
| 7          | 332.8        |
| 0          | 463.5        |
| 3          | 388.4        |
| 1          | 333.9        |
| 5          | 403.2        |
| 6          | 391          |
| 5          | 401.3        |
| 0          | 423.8        |
| 8          | 341.6        |
| 2          | 376.2        |
| 5          | 420.5        |
| 5          | 314.8        |
| 5          | 284.9        |
| 0          | 393          |
| 3          | 347.6        |
| 3          | 347.4        |
| 2          | 427.4        |
| 7          | 269.6        |
| 7          | 287.3        |
| 4          | 361.4        |
| 4          | 236          |
| 4          | 369          |

|   |       |
|---|-------|
| 6 | 185.1 |
| 1 | 331.9 |
